# Supplementary material for: Rapid growth accelerates telomere attrition in a transgenic fish
Source: PubMed Central journal article supplement (PMC4535669; doi:10.1186/s12862-015-0436-8), 2015-08-14
Supplement: 12862_2015_436_MOESM1_ESM.pdf [file 12862_2015_436_MOESM1_ESM.pdf]

## Additional file 1

Weight, length, and specific growth rate (SGR) of wild-type and GH-transgenic coho salmon.

Morphological characteristics of wild-type (WT, n = 15) and GH-transgenic coho salmon (T, n = 23) at first (age ca. 7 months) and second sampling (age ca. 17 months). SGR is calculated for weight or length, respectively, as  $SGR = 100 * [\ln(\text{second}) - \ln(\text{first})] / 307 \text{ days}$ .

Mean  $\pm$  SE (first rows) and range (second rows) are presented.

|    | Weight (g)     |                  |                  | Length (cm)    |                |                  |
|----|----------------|------------------|------------------|----------------|----------------|------------------|
|    | first          | second           | SGR              | first          | second         | SGR              |
| WT | 12.0 $\pm$ 0.7 | 24.5 $\pm$ 1.7   | 0.26 $\pm$ 0.019 | 9.4 $\pm$ 0.2  | 13.2 $\pm$ 0.7 | 0.11 $\pm$ 0.015 |
|    | 8.1 – 18.6     | 17.1 – 41.9      | 0.13 – 0.37      | 8.5 – 11.0     | 10.0 – 21.1    | 0.027 – 0.28     |
| T  | 21.7 $\pm$ 0.5 | 752.8 $\pm$ 58.7 | 1.12 $\pm$ 0.039 | 12.1 $\pm$ 0.1 | 37.6 $\pm$ 1.1 | 0.37 $\pm$ 0.011 |
|    | 17.2 – 26.9    | 136.0 – 1197.0   | 0.59 – 1.32      | 11.0 – 13.1    | 23.0 – 42.5    | 0.20 – 0.43      |
