# Supplementary material for: Rapid growth accelerates telomere attrition in a transgenic fish
Source: PubMed Central journal article supplement (PMC4535669; doi:10.1186/s12862-015-0436-8), 2015-08-14
Supplement: 12862_2015_436_MOESM2_ESM.pdf [file 12862_2015_436_MOESM2_ESM.pdf]

## Additional file 2

Summary of primer sequences used in telomere (Tel) and beta-actin (Actin) qPCR assays. The primer name, its nucleotide sequence as well as the source that provided the primer sequence is presented.

| Primer           | Sequence (5' → 3')                                     | Designed by    |
|------------------|--------------------------------------------------------|----------------|
| Tel 1b (forward) | CGG TTT GTT TGG GTT TGG GTT TGG GTT<br>TGG GTT TGG GTT | R.M. Cawthon*  |
| Tel 2b (reverse) | GGC TTG CCT TAC CCT TAC CCT TAC CCT<br>TAC CCT TAC CCT | R. M. Cawthon* |
| Actin (forward)  | TGG CAT CAC ACC TTC TAC                                | B. Wassmur†    |
| Actin (reverse)  | AAT CTG GGT CAT CTT CTC C                              | B. Wassmur†    |

\*Eccles Institute of Human Genetics, Univ. Utah, USA; †Department of Biological and Environmental Sciences, Univ. Gothenburg, Sweden
