# Supplementary material for: Rapid growth accelerates telomere attrition in a transgenic fish
Source: PubMed Central journal article supplement (PMC4535669; doi:10.1186/s12862-015-0436-8), 2015-08-14
Supplement: 12862_2015_436_MOESM3_ESM.pdf [file 12862_2015_436_MOESM3_ESM.pdf]

### Additional file 3

Summary of standard curve characteristics for all telomere and beta-actin qPCR assays. On each of five telomere and five beta-actin qPCR amplification plates, a standard curve was included in triplicate. For the telomere and beta-actin assays separately, the mean  $\pm$  SE (first rows), as well as the range (second rows) are presented for the slope, y-intercept, coefficient of determination  $R^2$ , and PCR efficiency.

|                | Telomere             | Beta-actin          |
|----------------|----------------------|---------------------|
| Slope          | $-3.17 \pm 0.024$    | $-3.47 \pm 0.085$   |
|                | $-3.24 - -3.098$     | $-3.70 - -3.30$     |
| y-intercept    | $12.80 \pm 0.019$    | $24.16 \pm 0.24$    |
|                | $12.73 - 12.84$      | $23.68 - 24.93$     |
| $R^2$          | $0.998 \pm 0.000316$ | $0.992 \pm 0.00261$ |
|                | $0.997 - 0.999$      | $0.985 - 0.998$     |
| PCR efficiency | $2.069 \pm 0.012$    | $1.95 \pm 0.029$    |
|                | $2.034 - 2.10$       | $1.87 - 2.010$      |
